# Supplementary material
Source: PubMed Central journal article supplement (PMC5313267)
Supplement: ONCO-22-25-s001.pdf [file ONCO-22-25-s001.pdf]

Supplemental Table for:  
Phase 2 and Biomarker Study of Cabozantinib in Metastatic Triple-Negative Breast Cancer Patients  
S. M. Tolaney et al.

**Table S1. Cabozantinib dose modification.**

|                             | <i>n</i> (%) | Weeks |
|-----------------------------|--------------|-------|
| <b>Dose Held</b>            | 34 (97)      | 69    |
| Reason                      |              |       |
| Toxicity                    | 26 (74)      | 57    |
| PPE                         | 7 (20)       | 23    |
| Diarrhea                    | 3 (9)        | 5     |
| Other toxicity              | 16 (46)      | 29    |
| Other (patient error, etc.) | 8 (23)       | 12    |
| <b>Dose Reduced</b>         | 12 (34)      | 13    |
| Reason                      |              |       |
| Toxicity                    | 12 (34)      | 13    |
| PPE                         | 4 (11)       | 5     |
| Other toxicity <sup>a</sup> | 8 (23)       | 8     |

<sup>a</sup> Including elevated alanine aminotransferase (*n*=1), diarrhea (*n*=1), hypertension (*n*=1), mucositis (*n*=1), pancreatitis (*n*=1), proteinuria (*n*=1), transaminitis (*n*=1), and other (*n*=1).  
PPE, palmar-plantar erythrodysesthesia.
